# Supplementary material
Source: HighWire-hosted journal article supplement (https://jnm.snmjournals.org/highwire/filestream/93967/field_highwire_adjunct_files/0/jnm058602_Supp_Fig.pdf)

**SUPPLEMENTAL FIGURE 1. Combining unconjugated antibodies with PT-RAIT.**

BALB/c nude mice bearing s.c. Ramos tumors were given a PT-RAIT with or without an unconjugated antibody. For PT-RAIT, TF4 was given 29.5 h before the injection of  $^{90}\text{Y}$ -IMP-288 ( $T_0$ ). Arrows indicate the time when the unconjugated antibodies were given. Each growth curve shows the fraction of animals cured ( $S$ ) and median time to  $2.5\text{ cm}^3$  ( $MS$ ). (A) Untreated; (B) Two mg epratuzumab (hLL2) on  $T_0$ , followed weekly x 3 with 0.5 mg epratuzumab (arrows). (C) One mg milatuzumab (hLL1) given at  $T_0$  followed weekly x 2 with 0.5 mg milatuzumab (arrows); (D) One mg veltuzumab (hA20) given  $T_0$ , with 3 x 0.5 mg veltuzumab given weekly (arrows); (E) 2.25 nmoles ( $355\text{ }\mu\text{g}$ ) followed 29 h later with 9.24 MBq ( $0.25\text{ mCi}$ ;  $0.09\text{ nmoles}$ )  $^{90}\text{Y}$ -IMP-288 ( $T_0$ ). (F) 2.4 nmoles ( $384\text{ }\mu\text{g}$ ) TF4 followed 29 h later 7.4 MBq ( $0.2\text{ mCi}$ ;  $0.12\text{ nmoles}$ )  $^{90}\text{Y}$ -IMP-288 ( $T_0$ ). Two mg epratuzumab (hLL2) was given 2 days later, and then weekly x 3 with 0.5 mg (arrows). (G) Treatment ‘E’ combined with 1 mg milatuzumab given at  $T_0$ , followed weekly x 3 with 0.5 mg hLL1 (arrows). (H) Treatment ‘E’ combined with 1 mg veltuzumab starting 1 week after the  $^{90}\text{Y}$ -IMP-288 with weekly x 3 doses of 0.5 mg veltuzumab (arrows).

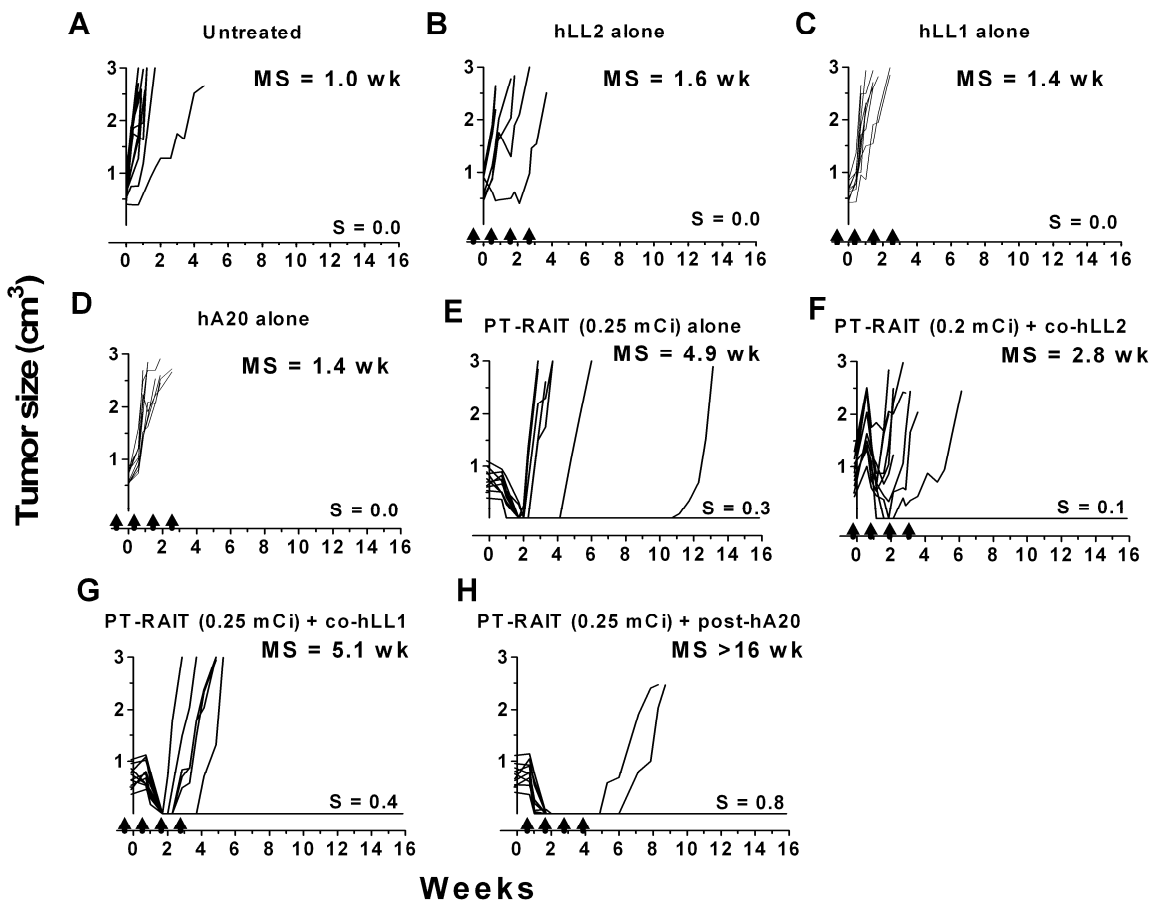

Supplement: jnm058602_Supp_Fig.pdf [file jnm058602_Supp_Fig.pdf]
